# Supplementary material for: Concordance between the In Vivo Content of Neurospecific Proteins (BDNF, NSE, VILIP-1, S100B) in the Hippocampus and Blood in Patients with Epilepsy
Source: MDPI journal article supplement (doi:10.3390/ijms25010502), 2023-12-29
Supplement: s1 [file s1]

**Table S1.** Patients' clinical information.

| <i>ID</i> | <i>Age</i> | <i>Gender</i> | <i>Disease<br/>duration,<br/>years</i> | <i>Average<br/>seizure<br/>frequency per<br/>month</i> | <i>Average<br/>seizure<br/>duration, s</i> | <i>AEDs before<br/>surgery</i> | <i>Resection<br/>size</i> | <i>Histology</i> | <i>Engel<br/>(ILAE),<br/>scales</i> | <i>Biochemical<br/>analysis</i> | <i>IHC<br/>analysis</i> |
|-----------|------------|---------------|----------------------------------------|--------------------------------------------------------|--------------------------------------------|--------------------------------|---------------------------|------------------|-------------------------------------|---------------------------------|-------------------------|
| 1         | 56         | F             | 42                                     | 5.5                                                    | N/A                                        | 1                              | a                         | HS               | 1A (class 1)                        | BDNF, NSE,<br>S100B             | NSE, S100B              |
| 2         | 23         | F             | 13                                     | 11                                                     | 60                                         | 2; 4                           | b                         | HG               | 1A (class 1)                        | BDNF, NSE,<br>S100B             | BDNF,<br>NSE, S100B     |
| 3         | 26         | M             | 23                                     | 1.5                                                    | 45                                         | 2                              | b                         | HG               | 4C (class 6)                        | BDNF, NSE,<br>S100B             | BDNF,<br>NSE, S100B     |
| 4         | 29         | M             | 28                                     | 10                                                     | 150                                        | 2                              | b                         | HG               | 1A (class 1)                        | BDNF, NSE,<br>S100B             | BDNF,<br>NSE, S100B     |
| 5         | 34         | M             | 9                                      | 4.5                                                    | 45                                         | 5; 6                           | c                         | HS               | 1A (class 1)                        | BDNF, NSE,<br>S100B             | BDNF,<br>NSE, S100B     |
| 6         | 32         | F             | 7                                      | 14                                                     | 35                                         | 2; 7                           | b                         | HG               | 1A (class 1)                        | BDNF, S100B                     | BDNF,<br>NSE, S100B     |

|    |    |   |    |     |     |         |   |    |              |                     |                     |
|----|----|---|----|-----|-----|---------|---|----|--------------|---------------------|---------------------|
| 7  | 28 | F | 28 | 1   | 315 | 2; 7    | b | HG | 3A (class 4) | BDNF, NSE,<br>S100B | BDNF,<br>NSE, S100B |
| 8  | 24 | M | 24 | 7   | 450 | 4       | b | HS | 2B (class 3) | BDNF, NSE,<br>S100B | BDNF,<br>NSE, S100B |
| 9  | 35 | M | 18 | 2   | 15  | 2; 5    | b | HG | 1B (class 2) | BDNF, NSE,<br>S100B | BDNF,<br>NSE, S100B |
| 10 | 43 | F | 20 | 3.5 | 60  | 7; 8; 9 | b | HG | 1B (class 2) | BDNF, NSE,<br>S100B | BDNF,<br>NSE, S100B |
| 11 | 24 | M | 17 | 3.5 | 240 | 2; 7    | b | HS | 1A (class 1) | BDNF, NSE,<br>S100B | BDNF,<br>NSE, S100B |
| 12 | 34 | F | 11 | 7   | 5   | 7; 8    | d | HG | 4C (class 6) | BDNF, NSE,<br>S100B | BDNF,<br>NSE, S100B |
| 13 | 27 | F | 16 | 5.5 | 80  | 2; 4    | b | HG | 1A (class 1) | BDNF, NSE,<br>S100B | BDNF,<br>NSE, S100B |
| 14 | 33 | F | 22 | 5.5 | 150 | 5       | c | HG | 3A (class 4) | BDNF, NSE,<br>S100B | BDNF,<br>NSE, S100B |
| 15 | 34 | M | 10 | 4   | 60  | 2; 4    | b | HS | 1A (class 1) | BDNF, NSE,<br>S100B | BDNF,<br>NSE, S100B |

|    |    |   |    |     |     |            |   |    |              |                     |                     |
|----|----|---|----|-----|-----|------------|---|----|--------------|---------------------|---------------------|
| 16 | 28 | F | 24 | 4.5 | 180 | 4; 5; 6; 7 | b | HG | 4B (class 5) | BDNF, NSE,<br>S100B | BDNF,<br>NSE, S100B |
| 17 | 32 | M | 18 | 9   | 90  | 7; 10      | b | HS | 3A (class 4) | BDNF, NSE,<br>S100B | BDNF,<br>NSE, S100B |
| 18 | 35 | M | 21 | 3.5 | 120 | 5; 6; 7    | b | HG | 1A (class 1) | BDNF, NSE,<br>S100B | BDNF,<br>NSE, S100B |
| 19 | 28 | F | 5  | 90  | 90  | 2; 4       | c | HS | 1A (class 1) | BDNF, NSE,<br>S100B | BDNF, NSE           |
| 20 | 36 | M | 11 | 6   | 70  | 7; 9; 10   | b | HS | 1A (class 1) | BDNF, NSE,<br>S100B | BDNF, NSE           |
| 21 | 49 | M | 47 | 2   | 120 | 7; 9       | b | HG | 1A (class 1) | BDNF, NSE,<br>S100B | BDNF, NSE           |
| 22 | 27 | M | 24 | 120 | 210 | 2; 5; 7; 9 | b | HG | 3A (class 4) | BDNF, NSE,<br>S100B | BDNF, NSE           |
| 23 | 29 | F | 28 | 150 | 90  | 2; 4; 5; 9 | b | HG | 3A (class 4) | BDNF, NSE,<br>S100B | BDNF, NSE           |
| 24 | 38 | F | 25 | 8   | 60  | 2; 4       | b | HS | 1B (class 2) | BDNF, NSE,<br>S100B | BDNF, NSE           |

|    |    |   |    |     |     |                  |   |    |              |                     |                     |
|----|----|---|----|-----|-----|------------------|---|----|--------------|---------------------|---------------------|
| 25 | 23 | M | 16 | 4   | 78  | 2; 4             | b | HS | 2B (class 3) | BDNF, NSE,<br>S100B | BDNF, NSE           |
| 26 | 35 | M | 9  | 30  | 60  | 2; 4             | b | HS | 3A (class 4) | BDNF, NSE,<br>S100B | BDNF, NSE           |
| 27 | 30 | F | 16 | 60  | 60  | 1; 2; 4; 5; 7; 8 | b | HG | 3A (class 4) | BDNF, NSE,<br>S100B | BDNF, NSE           |
| 28 | 31 | F | 3  | 11  | 60  | 4; 8             | b | HS | 1A (class 1) | BDNF, NSE,<br>S100B | BDNF, NSE           |
| 29 | 38 | M | 33 | 6   | 68  | 1; 2             | b | HS | 1A (class 1) | BDNF, NSE,<br>S100B | BDNF, NSE           |
| 30 | 19 | M | 16 | 1.5 | 150 | 6; 9             | b | HG | 1A (class 1) | BDNF, NSE,<br>S100B | BDNF, NSE           |
| 31 | 39 | M | 26 | 2.5 | 120 | 2; 8             | b | HG | 3A (class 4) | BDNF, NSE,<br>S100B | BDNF, NSE           |
| 32 | 35 | F | 20 | 10  | 180 | 8; 9             | b | HS | 3A (class 4) | BDNF, NSE,<br>S100B | BDNF,<br>NSE, S100B |
| 33 | 39 | M | 21 | 165 | 90  | 6; 7             | b | HS | 2B (class 3) | BDNF, NSE,<br>S100B | BDNF,<br>NSE, S100B |

|    |    |   |    |     |     |         |   |    |              |                     |                     |
|----|----|---|----|-----|-----|---------|---|----|--------------|---------------------|---------------------|
| 34 | 31 | M | 24 | 5.5 | 87  | 7; 9    | b | HS | 1A (class 1) | BDNF, NSE,<br>S100B | BDNF, NSE           |
| 35 | 40 | F | 20 | 30  | 90  | 4       | c | HS | 1A (class 1) | BDNF, NSE,<br>S100B | BDNF,<br>NSE, S100B |
| 36 | 37 | F | 28 | 3.5 | 193 | 4; 5    | b | HS | 4B (class 5) | BDNF, NSE,<br>S100B | BDNF,<br>NSE, S100B |
| 37 | 31 | F | 19 | 12  | 75  | 2; 3; 4 | b | HS | 1B (class 2) | BDNF, NSE,<br>S100B | BDNF,<br>NSE, S100B |
| 38 | 39 | M | 19 | 1.5 | 77  | 4; 5; 9 | b | HS | 4B (class 5) | BDNF, NSE,<br>S100B | BDNF,<br>NSE, S100B |
| 39 | 41 | F | 33 | 210 | 90  | 1; 2; 4 | b | HS | 1A (class 1) | BDNF, NSE,<br>S100B | BDNF,<br>NSE, S100B |
| 40 | 39 | M | 28 | 1.5 | 30  | 7; 9    | b | HS | 3A (class 4) | BDNF, NSE,<br>S100B | BDNF,<br>NSE, S100B |
| 41 | 47 | M | 7  | 2   | 180 | 5; 7    | b | HS | 1A (class 1) | BDNF, NSE,<br>S100B | BDNF,<br>NSE, S100B |
| 42 | 39 | F | 28 | 20  | 900 | 4       | b | HS | 4B (class 5) | -                   | BDNF,<br>NSE, S100B |

|    |    |   |    |    |     |         |   |    |              |   |                     |
|----|----|---|----|----|-----|---------|---|----|--------------|---|---------------------|
| 43 | 47 | M | 44 | 2  | 320 | 4; 5; 7 | b | HS | 3A (class 4) | - | BDNF,<br>NSE, S100B |
| 44 | 29 | M | 6  | 30 | 60  | 4       | b | HS | 1A (class 1) | - | BDNF,<br>NSE, S100B |

**Abbreviations:** M - male, F - female, AEDs - anti-epileptic drugs, HS - hippocampal sclerosis, HG - hippocampal gliosis, IHC analysis - immunohistochemical analysis, N/A - information is not available

**Supplementary 1.** Anti-epileptic drugs.

| <i>Number in<br/>Table S1</i> | <i>Pharmacologic Class</i>                    | <i>Mechanism of Action</i>                                                           |
|-------------------------------|-----------------------------------------------|--------------------------------------------------------------------------------------|
| 1                             | Barbiturates and derivatives                  | Stimulate the inhibitory activity of GABAergic receptors                             |
| 2                             | Carboxamide's derivatives                     | Stimulate the inhibitory activity of GABAergic receptors; regulation of ion channels |
| 3                             | Benzodiazepine's derivatives                  | Stimulate the inhibitory activity of GABAergic receptors                             |
| 4                             | Other anti-epileptic drugs /<br>Levetiracetam | Regulation of ion channels                                                           |

|    |                                             |                                                                                            |
|----|---------------------------------------------|--------------------------------------------------------------------------------------------|
| 5  | Other anti-epileptic drugs /<br>Lamotrigine | Regulation of ion channels                                                                 |
| 6  | Other anti-epileptic drugs /<br>Perampanel  | Reduce the excitatory activity of<br>NMDA receptors                                        |
| 7  | Valproic acid's derivatives                 | Stimulate the inhibitory activity of<br>GABAergic receptors                                |
| 8  | Other anti-epileptic drugs /<br>Topiramate  | Stimulate the inhibitory activity of<br>GABAergic receptors                                |
| 9  | Other anti-epileptic drugs /<br>Lacosamide  | Regulation of ion channels                                                                 |
| 10 | Other anti-epileptic drugs /<br>Zonisamide  | Stimulate the inhibitory activity of<br>GABAergic receptors; regulation<br>of ion channels |

**Supplementary 2.** Resection size.

| <i>Sign in</i>  | <i>Resected brain areas</i>                                |
|-----------------|------------------------------------------------------------|
| <i>Table S1</i> |                                                            |
| a               | the hippocampus; areas of basal parts of the temporal lobe |

|   |                                                                                                                                                |
|---|------------------------------------------------------------------------------------------------------------------------------------------------|
| b | the hippocampus; areas of basal parts of the temporal lobe up to 5 (4.5-6) cm from the pole (basal and medial parts subepically); the amygdala |
| c | the hippocampus; the amygdala                                                                                                                  |
| d | the amygdala-hippocampal complex of the temporal lobe                                                                                          |

**Supplementary 3.** Classification of outcomes after surgical treatment of epilepsy.

#### Engel's scale (1993)

- ***Class I: Free of disabling seizures***

- A. Completely seizure free since surgery
- B. Non disabling simple partial seizures only since surgery
- C. Some disabling seizures after surgery, but free of disabling seizures for at least 2 years
- D. Generalized convulsions with AEDs withdrawal only

- ***Class II: Rare disabling seizures ("almost seizure-free")***

- A. Initially free of disabling seizures but has rare seizures now
- B. Rare disabling seizures since surgery
- C. More than rare disabling seizures since surgery, but rare seizures for the last 2 years
- D. Nocturnal seizures only

- ***Class III: Worthwhile improvement***

- A. Worthwhile seizure reduction,



---

B. Prolonged seizure-free intervals amounting to greater than half the followed-up period, but not <2 years

---

- ***Class IV: No worthwhile improvement***

A: Significant seizure reduction

B: No appreciable change

C: Seizures worse

---

**ILAE classification (2001)**

---

***Class 1:*** Completely seizure free; no auras

---

***Class 2:*** Only auras; no other seizures

---

***Class 3:*** One to three seizure days per year;  $\pm$  auras

---

***Class 4:*** Four seizure days per year to 50% reduction of baseline seizure days;  $\pm$  auras

---

***Class 5:*** Less than 50% reduction of baseline seizure days to 100% increase of baseline seizure days;  
 $\pm$  auras

---

***Class 6:*** More than 100% increase of baseline seizure days;  $\pm$  auras

---
